# Supplementary material for: Serologic Response and Safety after a Third Dose of the COVID-19 BNT162b2 Vaccine in Patients with Inflammatory Bowel Diseases
Source: MDPI journal article supplement (doi:10.3390/vaccines11071263), 2023-07-20
Supplement: s1 [file s1]

Supplemental data:

**Table S1:** Univariate analysis at visit 5

| Variable                           |                       | n/N     | GMC (95%CI)/Spearman's rho | P Value          |
|------------------------------------|-----------------------|---------|----------------------------|------------------|
| Treatment                          | HC                    | 73/197  | 17069 (14085-20684)        | <b>0.020</b>     |
|                                    | Non-anti-TNF $\alpha$ | 71/197  | 16594 (12977-21220)        |                  |
|                                    | Anti-TNF $\alpha$     | 53/197  | 9709 (6985-13495)          |                  |
| Non-anti-TNF $\alpha$ subgroups    | Vedolizumab           | 17/124  | 24448 (15834-37748)        | <b>0.037</b>     |
|                                    | 5-ASA                 | 18/124  | 10010 (6280-15953)         |                  |
|                                    | Other                 | 69/124  | 11316 (8320-15391)         |                  |
|                                    | No treatment          | 20/124  | 17032 (12151-23872)        |                  |
| Gender                             | Male                  | 96/197  | 135353 (12305-19155)       | 0.461            |
|                                    | Female                | 101/197 | 13765 (11339-16709)        |                  |
| Age (years)                        |                       | 194/197 | Rho=-0.186                 | <b>0.009</b>     |
| BMI (kg/m <sup>2</sup> )           |                       | 196/197 | Rho=0.063                  | 0.381            |
| Diagnosis                          | CD                    | 82/124  | 12924 (9825-16999)         | 0.976            |
|                                    | UC                    | 33/124  | 13599 (9889-18700)         |                  |
|                                    | IBD-U                 | 3/124   | 14037 (1115-176662)        |                  |
|                                    | IPAA                  | 6/124   | 14439 (5412-38522)         |                  |
| Hemoglobin value (g/dL)            |                       | 179/197 | Rho=0.025                  | 0.743            |
| WBC value (K/micl)                 |                       | 195/197 | Rho=0.037                  | 0.608            |
| CRP value (mg/dL)                  |                       | 192/197 | Rho=0.064                  | 0.379            |
| $\Delta$ dose 2 and dose 3 (days)  |                       | 197/197 | Rho=0.149                  | <b>0.037</b>     |
| $\Delta$ dose 3 and visit 5 (days) |                       | 197/197 | Rho=-0.260                 | <b>&lt;0.001</b> |
|                                    |                       |         |                            |                  |

**Table S2:** Univariate analysis at visit 6

| Variable                        |                       | n/N     | GMC (95%CI)/Spearman's rho | P Value      |
|---------------------------------|-----------------------|---------|----------------------------|--------------|
| Treatment                       | HC                    | 66/149  | 6509 (5086-8330)           | <b>0.003</b> |
|                                 | Non-anti-TNF $\alpha$ | 52/149  | 8209 (5863-11493)          |              |
|                                 | Anti-TNF $\alpha$     | 31/149  | 3283 (1989-5418)           |              |
| Non-anti-TNF $\alpha$ subgroups | Vedolizumab           | 13/82   | 12687 (6816-23614)         | <b>0.031</b> |
|                                 | 5-ASA                 | 9/82    | 9703 (4456-21126)          |              |
|                                 | Other                 | 38/82   | 4001 (2464-6495)           |              |
|                                 | No treatment          | 22/82   | 5585 (3299-9454)           |              |
| Gender                          | Male                  | 69/149  | 6464 (4775-8751)           | 0.608        |
|                                 | Female                | 80/149  | 5840 (4522-7540)           |              |
| Age (years)                     |                       | 147/149 | Rho=-0.137                 | 0.099        |
| BMI (kg/m <sup>2</sup> )        |                       | 147/149 | Rho=0.134                  | 0.106        |
| Diagnosis                       | CD                    | 59/83   | 5304 (3638-7732)           | 0.787        |
|                                 | UC                    | 19/83   | 7593 (4556-12656)          |              |
| Hemoglobin value (g/dL)         |                       | 146/149 | Rho=0.128                  | 0.124        |
| WBC value (K/micl)              |                       | 146/149 | Rho=-0.078                 | 0.349        |
| CRP value (mg/dL)               |                       | 143/149 | Rho=0.128                  | 0.127        |

**Table S3:** Specific adverse events one month after third vaccine dose

| Adverse events, n (%)      | Anti-TNF $\alpha$ | Non-anti-TNF $\alpha$ | HC        |
|----------------------------|-------------------|-----------------------|-----------|
| Pain at injection site     | 30 (78.9)         | 47 (81.0)             | 46 (83.6) |
| Swelling at injection site | 8 (21.1)          | 8 (13.8)              | 6 (10.9)  |
| Fever (>38°C)              | 4 (10.5)          | 9 (15.5)              | 1 (1.8)   |
| Headache                   | 14 (37.8)         | 17 (28.8)             | 12 (21.8) |
| Shivering                  | 4 (10.8)          | 10 (16.9)             | 7 (12.7)  |
| Nausea                     | 2 (5.4)           | 3 (5.1)               | 4 (7.3)   |
| Dizziness                  | 3 (8.1)           | 8 (13.6)              | 4 (7.3)   |
| Fatigue                    | 21 (56.8)         | 28 (47.5)             | 18 (32.7) |
| Muscle soreness            | 4 (10.8)          | 12 (20.3)             | 6 (10.9)  |
| Joints pain                | 3 (8.1)           | 5 (8.5)               | 1 (1.8)   |
| Allergic reaction          | -----             | -----                 | 1 (1.8)   |
| Others <sup>a</sup>        | 3 (8.1)           | 9 (15.3)              | 10 (18.2) |

<sup>a</sup>Others include = general weakness, flu-like symptoms, vaginal bleeding, lymph node swelling, cough, throat and ear pain, aphthous stomatitis.

**Table S4:** Change in disease activity measured by the difference in questionnaire scores (HBI, SCCAI for patients with CD and UC, respectively)

|                      | <b>CD</b> | <b>UC</b> |
|----------------------|-----------|-----------|
| Clinical improvement | 32        | 11        |
| Clinical worsening   | 6         | 1         |
| No change            | 44        | 21        |

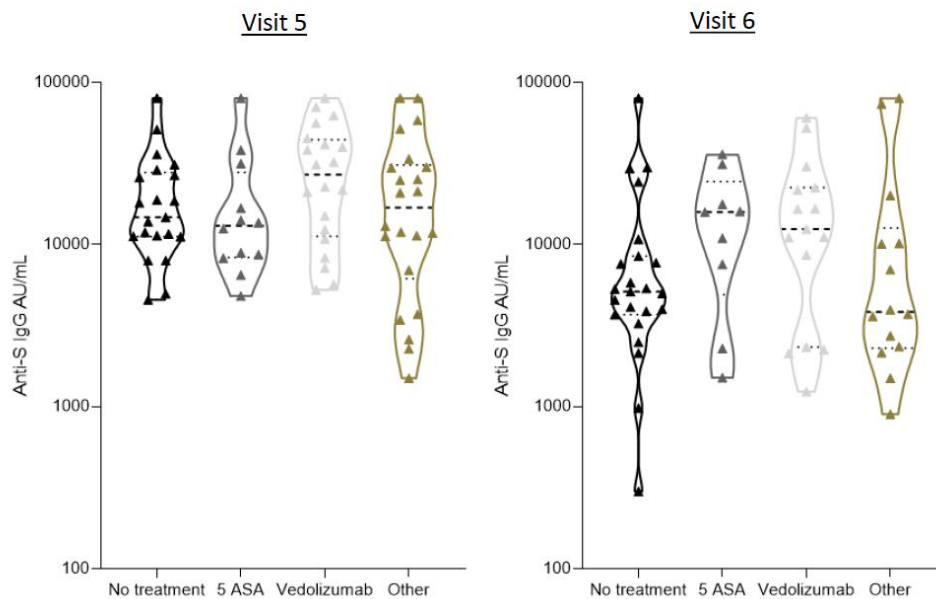

**Figure S1:** (A) Serologic responses in visits 5 to subgroups within non-anti-TNF $\alpha$  group stratified according to their medical treatment: no medical treatment (in black), 5-ASA (in dark grey), Vedolizumab (in light grey), other medical treatment which relatively small subgroups (Steroids, immunomodulators, ustekinumab and tofacitinib; in brown). Black solid lines denote median, dashed lines denote IQR 25-75. (B) Serologic responses in visits 6 to subgroups within non-anti-TNF $\alpha$  group stratified according to their medical treatment: no medical treatment (in black), 5-ASA (in dark grey), Vedolizumab (in light grey), other medical treatment which relatively small subgroups (immunomodulators, ustekinumab, tofacitinib and clinical study drug; in brown). Black solid lines denote median, dashed lines denote IQR 25-75.

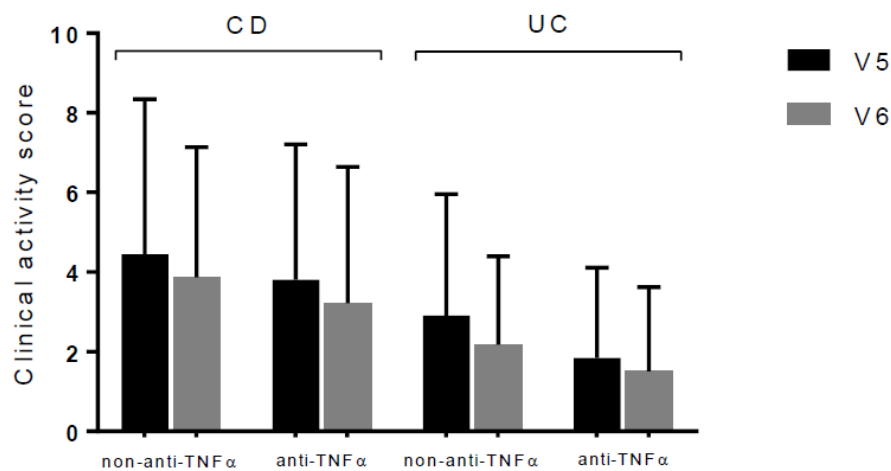

**Figure S2: Disease activity during follow up.** Activity was measured by validated questionnaires. Bars represent the average score of either HBI for CD or SCCAI for UC, stratified according to treatment (with and without anti-TNFα), after 1- and 3- months three vaccine doses (visit 5, black; visit 6, grey, respectively). Error bars denote SD. The difference between the groups was not significant using Independent-Samples Kruskal-Wallis Test.

Abbreviations: HBI=Harvey-Bradshaw Index; SCCAI=Simple Clinical Colitis Activity Index, UC=Ulcerative colitis, CD=Crohn's disease
